# Supplementary material for: Machine learning enabling high-throughput and remote operations at large-scale user facilities
Source: Royal Society of Chemistry journal article supplement (doi:10.1039/d2dd00014h), 2022-01-01
Supplement: d2dd00014h1.pdf [file d2dd00014h1.pdf]

## Supplemental Materials for: Machine learning enabling high-throughput and remote operations at large-scale user facilities

Tatiana Konstantinova,\* Phillip M. Maffettone,\* Stuart I. Campbell, Andi M. Barbour, and Daniel Olds†  
*National Synchrotron Light Source II, Brookhaven National Laboratory, Upton, NY 11973, USA*

Bruce Ravel  
*National Institute of Standards and Technology, Gaithersburg, MD 20899, USA*

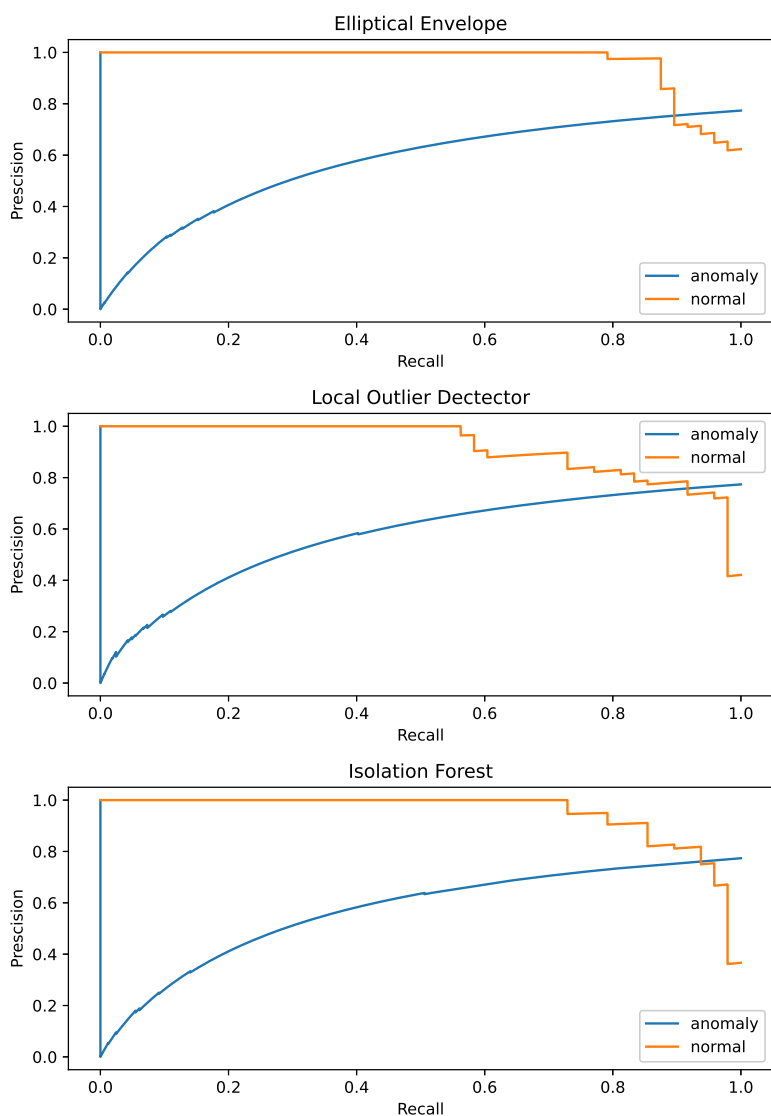

FIG. 1. Precision-Recall curves for anomaly detection models.

\* These two authors contributed equally

† dolds@bnl.gov
